# Supplementary material for: Predicting range shifts of three endangered endemic plants of the Khorassan-Kopet Dagh floristic province under global change
Source: PubMed Central journal article supplement (PMC8080812; doi:10.1038/s41598-021-88577-x), 2021-04-28
Supplement: 41598_2021_88577_MOESM1_ESM.pdf [file 41598_2021_88577_MOESM1_ESM.pdf]

Predicting range shifts of three endangered endemic  
plants of the Khorassan-Kopet Dagh floristic province  
under global change

Mohammad Bagher Erfanian<sup>1,\*</sup>, Mostafa Sagharyan<sup>2</sup>,  
Farshid Memariani<sup>3</sup>, and Hamid Ejtehadi<sup>1</sup>

<sup>1</sup> *Quantitative Plant Ecology and Biodiversity Research  
Lab., Department of Biology, Faculty  
of Science, Ferdowsi University of Mashhad, Mashhad,  
Iran*

<sup>2</sup> *Department of Plant Biology, Faculty of Biological  
Science, Tarbiat Modares University, Tehran, Iran*

<sup>3</sup> *Herbarium FUMH, Department of Botany, Research  
Center for Plant Sciences, Ferdowsi University of  
Mashhad, Mashhad, Iran*

\*Corresponding author: M.B. Erfanian,  
[b.erfanian@um.ac.ir](mailto:b.erfanian@um.ac.ir), Tel.: +98-51-38804167, Fax: +98-  
51-38796416, PO BOX 9177948974

| decimalLongitude | decimalLatitude | Nepeta.binaloudensis |
|------------------|-----------------|----------------------|
| 58.60859         | 36.6682         | 1                    |
| 59.04881         | 36.32588        | 1                    |
| 59.12677         | 36.28207        | 1                    |
| 59.24686         | 36.21438        | 1                    |
| 59.39079         | 36.99671        | 1                    |
| 59.3987          | 37.00781        | 1                    |
| 59.36183         | 36.97937        | 0                    |
| 59.33874         | 36.9723         | 0                    |
| 59.35057         | 36.96979        | 0                    |
| 59.29109         | 36.95311        | 0                    |
| 59.01947         | 36.83692        | 0                    |
| 59.10613         | 36.33733        | 0                    |
| 59.12553         | 36.38155        | 0                    |
| 59.15599         | 36.42008        | 0                    |
| 59.16349         | 36.43053        | 0                    |
| 59.18635         | 36.44905        | 0                    |
| 59.1991          | 36.4607         | 0                    |
| 59.21352         | 36.46974        | 0                    |
| 59.22557         | 36.48154        | 0                    |
| 59.22229         | 36.49335        | 0                    |
| 59.24055         | 36.50963        | 0                    |
| 59.25917         | 36.52032        | 0                    |
| 59.28256         | 36.53247        | 0                    |
| 59.21331         | 36.53309        | 0                    |
| 59.05428         | 36.28736        | 0                    |
| 59.493           | 36.28445        | 0                    |
| 59.07882         | 36.3053         | 0                    |
| 59.11563         | 36.35953        | 0                    |
| 59.13639         | 36.16472        | 0                    |
| 59.47917         | 36.28861        | 0                    |
| 59.49681         | 36.27522        | 0                    |
| 59.53111         | 36.31196        | 0                    |
| 59.5             | 35.5            | 0                    |
| 60               | 36.316          | 0                    |
| 63.30629         | 33.8855         | 0                    |
| 55.09597         | 36.76064        | 0                    |
| 62.45447         | 33.95406        | 0                    |
| 57.67678         | 35.19537        | 0                    |
| 63.03572         | 33.49345        | 0                    |
| 57.69889         | 35.87946        | 0                    |
| 64.36246         | 34.59253        | 0                    |
| 54.57556         | 36.39169        | 0                    |
| 59.184           | 36.13           | 1                    |
| 59.282           | 36.249          | 1                    |

|        |        |   |
|--------|--------|---|
| 59.108 | 36.282 | 1 |
| 59.206 | 36.306 | 1 |
| 59.131 | 36.312 | 1 |
| 59.108 | 36.371 | 1 |
| 59.284 | 36.428 | 1 |

| decimalLatitude | decimalLongitude | Phlomoides.binaloudensis |
|-----------------|------------------|--------------------------|
| 36.087          | 59.288           | 1                        |
| 36.121          | 59.37            | 1                        |
| 36.274          | 59.116           | 1                        |
| 36.305          | 59.155           | 1                        |
| 36.354          | 58.889           | 1                        |
| 36.377          | 59.258           | 1                        |
| 36.584          | 58.949           | 1                        |
| 36.59657        | 58.59321         | 1                        |
| 36.78083        | 58.55241         | 1                        |
| 36.36046        | 59.11382         | 1                        |
| 36.3639         | 59.11003         | 1                        |
| 36.72587        | 59.84027         | 0                        |
| 36.68079        | 59.92821         | 0                        |
| 36.69714        | 59.83772         | 0                        |
| 36.6933         | 59.79366         | 0                        |
| 36.69085        | 59.77002         | 0                        |
| 36.75945        | 59.87055         | 0                        |
| 36.7865         | 59.88192         | 0                        |
| 36.78007        | 59.84174         | 0                        |
| 36.74736        | 59.77523         | 0                        |
| 36.77661        | 59.80681         | 0                        |
| 36.75023        | 59.74981         | 0                        |
| 36.66066        | 59.61685         | 0                        |
| 36.69443        | 59.63573         | 0                        |
| 36.80957        | 59.85363         | 0                        |
| 36.79735        | 59.80603         | 0                        |
| 36.78855        | 59.71586         | 0                        |
| 36.78053        | 59.64075         | 0                        |
| 36.76374        | 59.60461         | 0                        |
| 36.75225        | 59.5694          | 0                        |
| 36.70963        | 59.51126         | 0                        |
| 36.73656        | 59.54857         | 0                        |
| 36.74391        | 59.55933         | 0                        |
| 36.76672        | 59.56239         | 0                        |
| 36.84574        | 59.59843         | 0                        |
| 36.83167        | 59.57944         | 0                        |
| 36.90834        | 59.74107         | 0                        |
| 36.88123        | 59.69605         | 0                        |
| 36.86461        | 59.6513          | 0                        |
| 36.85712        | 59.62217         | 0                        |
| 36.81668        | 59.54302         | 0                        |
| 36.81346        | 59.4931          | 0                        |
| 36.96459        | 59.71897         | 0                        |
| 36.91806        | 59.6534          | 0                        |

|          |          |   |
|----------|----------|---|
| 36.90367 | 59.61714 | 0 |
| 36.89321 | 59.5878  | 0 |
| 36.87908 | 59.55394 | 0 |
| 36.8637  | 59.53741 | 0 |
| 36.84516 | 59.52282 | 0 |
| 36.82904 | 59.50353 | 0 |
| 36.80304 | 59.48163 | 0 |
| 36.77382 | 59.42939 | 0 |
| 36.80013 | 59.45515 | 0 |
| 36.82079 | 59.48514 | 0 |
| 36.84604 | 59.50428 | 0 |
| 36.88925 | 59.55656 | 0 |
| 36.91446 | 59.57303 | 0 |
| 36.93449 | 59.60411 | 0 |
| 36.93781 | 59.54898 | 0 |
| 36.91781 | 59.52216 | 0 |
| 36.9052  | 59.49514 | 0 |
| 36.89924 | 59.48142 | 0 |
| 36.89694 | 59.46765 | 0 |
| 36.87993 | 59.44947 | 0 |
| 36.86421 | 59.43076 | 0 |
| 36.85082 | 59.4125  | 0 |
| 36.82932 | 59.39336 | 0 |
| 36.83251 | 59.36401 | 0 |
| 36.85704 | 59.37502 | 0 |
| 36.87798 | 59.40154 | 0 |
| 36.88912 | 59.41974 | 0 |
| 36.90673 | 59.42252 | 0 |
| 36.92152 | 59.44999 | 0 |
| 36.93699 | 59.45983 | 0 |
| 36.97345 | 59.48022 | 0 |
| 36.99489 | 59.51211 | 0 |
| 37.02616 | 59.53403 | 0 |
| 36.99658 | 59.47834 | 0 |
| 36.97833 | 59.42321 | 0 |
| 36.97149 | 59.40169 | 0 |
| 36.95078 | 59.38326 | 0 |
| 36.93573 | 59.35447 | 0 |
| 36.91037 | 59.3211  | 0 |
| 36.90191 | 59.31593 | 0 |
| 36.92895 | 59.32427 | 0 |
| 36.84723 | 59.28712 | 0 |
| 36.89299 | 59.30308 | 0 |
| 36.93543 | 59.31138 | 0 |
| 37.00958 | 59.38496 | 0 |

|          |          |   |
|----------|----------|---|
| 37.04352 | 59.41232 | 0 |
| 37.03285 | 59.37978 | 0 |
| 37.00578 | 59.32974 | 0 |
| 37.00474 | 59.28308 | 0 |
| 37.02931 | 59.30033 | 0 |
| 37.03428 | 59.24338 | 0 |
| 37.07683 | 59.1004  | 0 |
| 36.9933  | 59.01839 | 0 |
| 37.05623 | 59.05242 | 0 |
| 37.05192 | 58.97054 | 0 |
| 36.97395 | 58.78465 | 0 |
| 37.03526 | 58.78311 | 0 |
| 37.09076 | 58.71078 | 0 |
| 36.71629 | 60.23407 | 0 |
| 36.71048 | 60.18659 | 0 |
| 36.69877 | 60.12353 | 0 |
| 36.67315 | 60.02527 | 0 |
| 36.65667 | 59.96075 | 0 |
| 36.63567 | 59.91268 | 0 |
| 36.57297 | 59.84025 | 0 |
| 36.52198 | 59.76838 | 0 |
| 36.47429 | 59.64499 | 0 |
| 36.45121 | 59.5874  | 0 |
| 36.38078 | 59.63273 | 0 |
| 36.38885 | 59.76544 | 0 |
| 36.31551 | 59.77293 | 0 |
| 36.39125 | 59.63537 | 0 |
| 36.78287 | 59.9055  | 0 |
| 36.84537 | 59.86076 | 0 |
| 36.84802 | 59.79867 | 0 |
| 36.834   | 59.75032 | 0 |
| 36.68648 | 59.67176 | 0 |
| 36.97482 | 59.64401 | 0 |
| 36.96569 | 59.61726 | 0 |
| 36.9428  | 59.58962 | 0 |
| 36.92633 | 59.57685 | 0 |
| 36.75098 | 59.00311 | 0 |
| 36.72546 | 58.99801 | 0 |
| 36.69726 | 59.0388  | 0 |
| 36.6704  | 59.04602 | 0 |
| 36.63369 | 59.06737 | 0 |
| 36.60689 | 59.08867 | 0 |
| 36.60017 | 59.27708 | 0 |
| 36.50842 | 59.46393 | 0 |
| 36.57348 | 60.02637 | 0 |

|          |          |   |
|----------|----------|---|
| 36.62673 | 60.04379 | 0 |
| 36.63979 | 59.957   | 0 |
| 36.64006 | 59.90089 | 0 |
| 36.69205 | 59.9505  | 0 |
| 36.70589 | 60.06947 | 0 |
| 36.74097 | 60.1353  | 0 |
| 36.78801 | 59.89403 | 0 |
| 36.79279 | 59.83774 | 0 |
| 36.78842 | 59.7974  | 0 |
| 36.77461 | 59.67137 | 0 |
| 36.80672 | 59.65334 | 0 |
| 36.76058 | 59.63706 | 0 |
| 36.72617 | 59.61535 | 0 |
| 36.71188 | 59.60217 | 0 |
| 36.69208 | 59.5939  | 0 |
| 36.75444 | 59.61189 | 0 |
| 36.76461 | 59.51963 | 0 |
| 36.74641 | 59.46525 | 0 |
| 36.73929 | 59.41904 | 0 |
| 36.74317 | 59.37281 | 0 |
| 36.70056 | 59.32138 | 0 |
| 36.68304 | 59.29178 | 0 |
| 36.64842 | 59.3232  | 0 |
| 37.10519 | 58.66687 | 0 |
| 37.16153 | 58.74415 | 0 |
| 37.39725 | 58.75718 | 0 |
| 37.42973 | 58.76681 | 0 |
| 37.39064 | 58.7024  | 0 |
| 37.36887 | 58.72768 | 0 |
| 37.40603 | 58.80474 | 0 |
| 37.42279 | 58.85227 | 0 |
| 37.3962  | 58.8224  | 0 |
| 37.35538 | 58.79043 | 0 |
| 37.34913 | 58.7529  | 0 |
| 37.3335  | 58.79561 | 0 |
| 37.28931 | 58.7534  | 0 |
| 37.2315  | 58.74865 | 0 |
| 37.17178 | 58.78164 | 0 |
| 37.18623 | 58.89712 | 0 |
| 37.24655 | 58.96168 | 0 |
| 37.18451 | 58.93679 | 0 |
| 37.23935 | 59.12079 | 0 |
| 37.22348 | 59.20629 | 0 |
| 37.17744 | 59.21417 | 0 |
| 37.10345 | 59.18024 | 0 |

|          |          |   |
|----------|----------|---|
| 37.06172 | 59.13421 | 0 |
| 37.10752 | 59.30888 | 0 |
| 37.10749 | 59.38991 | 0 |
| 36.87114 | 59.00148 | 0 |
| 36.94362 | 59.11303 | 0 |
| 36.89063 | 59.04438 | 0 |
| 36.95862 | 59.34409 | 0 |
| 36.97345 | 59.56467 | 0 |
| 36.91957 | 59.62678 | 0 |
| 36.85793 | 59.6341  | 0 |
| 36.77211 | 59.70606 | 0 |
| 36.74705 | 59.90592 | 0 |
| 36.64895 | 59.88526 | 0 |
| 37.06202 | 59.51236 | 0 |
| 37.08206 | 59.72071 | 0 |
| 37.09632 | 59.68558 | 0 |
| 36.87275 | 59.94283 | 0 |
| 36.84491 | 59.90472 | 0 |
| 36.74312 | 59.83154 | 0 |
| 36.68538 | 59.78646 | 0 |
| 36.63545 | 59.74637 | 0 |
| 36.65659 | 59.72264 | 0 |
| 36.63778 | 60.00589 | 0 |
| 36.63992 | 60.06291 | 0 |
| 36.6188  | 60.05853 | 0 |
| 36.58251 | 60.06474 | 0 |
| 36.35421 | 59.95143 | 0 |
| 36.41766 | 59.79367 | 0 |
| 36.63132 | 59.94818 | 0 |
| 36.64742 | 60.13899 | 0 |
| 35.91736 | 59.90191 | 0 |
| 37.13383 | 59.18624 | 0 |
| 37.11954 | 59.17257 | 0 |
| 37.12809 | 59.24688 | 0 |
| 37.10541 | 59.23697 | 0 |
| 37.07331 | 59.24598 | 0 |
| 37.13301 | 59.28483 | 0 |
| 37.10573 | 59.33741 | 0 |
| 37.08276 | 59.39067 | 0 |
| 37.05193 | 59.4345  | 0 |
| 37.03696 | 59.4313  | 0 |
| 37.0189  | 59.42701 | 0 |
| 37.01009 | 59.41643 | 0 |
| 36.99706 | 59.41325 | 0 |
| 36.98784 | 59.42173 | 0 |



|          |          |   |
|----------|----------|---|
| 37.01316 | 59.46277 | 0 |
| 37.04119 | 59.48855 | 0 |
| 37.0488  | 59.52081 | 0 |
| 37.03964 | 59.54007 | 0 |
| 37.0267  | 59.55947 | 0 |
| 37.58387 | 58.50859 | 0 |
| 37.58718 | 58.4829  | 0 |
| 37.59046 | 58.46525 | 0 |
| 37.61098 | 58.45875 | 0 |
| 37.6278  | 58.44982 | 0 |
| 37.6236  | 58.4209  | 0 |
| 37.62893 | 58.40728 | 0 |
| 37.63828 | 58.40899 | 0 |
| 37.6429  | 58.42152 | 0 |
| 37.63547 | 58.43907 | 0 |
| 37.64031 | 58.46109 | 0 |
| 37.63324 | 58.46883 | 0 |
| 37.62705 | 58.49811 | 0 |
| 37.56229 | 58.5277  | 0 |
| 37.55375 | 58.51759 | 0 |
| 37.54309 | 58.52863 | 0 |
| 37.51992 | 58.50506 | 0 |
| 37.50339 | 58.50401 | 0 |
| 37.49213 | 58.49729 | 0 |
| 37.47556 | 58.51304 | 0 |
| 37.48657 | 58.56216 | 0 |
| 37.46334 | 58.52748 | 0 |
| 37.4475  | 58.54779 | 0 |
| 37.44398 | 58.57374 | 0 |
| 37.46805 | 58.60307 | 0 |
| 37.49332 | 58.62248 | 0 |
| 37.5142  | 58.65011 | 0 |
| 37.57022 | 58.64852 | 0 |
| 37.58447 | 58.6235  | 0 |
| 37.57974 | 58.64947 | 0 |
| 37.59351 | 58.6549  | 0 |
| 37.56914 | 58.67166 | 0 |
| 37.5553  | 58.6723  | 0 |
| 37.53933 | 58.66175 | 0 |
| 37.52176 | 58.66365 | 0 |
| 37.50316 | 58.66087 | 0 |
| 37.48358 | 58.64729 | 0 |
| 37.46868 | 58.64103 | 0 |
| 37.45845 | 58.62539 | 0 |
| 37.44518 | 58.61833 | 0 |

|          |          |   |
|----------|----------|---|
| 37.43593 | 58.61947 | 0 |
| 37.43367 | 58.63367 | 0 |
| 37.44385 | 58.66118 | 0 |
| 37.43381 | 58.68178 | 0 |
| 37.44496 | 58.70646 | 0 |
| 37.46636 | 58.7246  | 0 |
| 37.46565 | 58.7445  | 0 |
| 37.47395 | 58.76965 | 0 |
| 37.48082 | 58.78849 | 0 |
| 37.47879 | 58.80368 | 0 |
| 37.47429 | 58.81453 | 0 |
| 37.4612  | 58.81204 | 0 |
| 37.4419  | 58.81486 | 0 |
| 37.42987 | 58.81314 | 0 |
| 37.41757 | 58.80764 | 0 |
| 37.40642 | 58.79225 | 0 |
| 37.3968  | 58.78119 | 0 |
| 37.38725 | 58.78461 | 0 |
| 37.37434 | 58.78114 | 0 |
| 37.36193 | 58.78201 | 0 |
| 37.35337 | 58.7765  | 0 |
| 37.33344 | 58.77286 | 0 |
| 37.31762 | 58.76875 | 0 |
| 37.3056  | 58.76627 | 0 |
| 37.29588 | 58.76719 | 0 |
| 37.28593 | 58.77233 | 0 |
| 37.28059 | 58.79659 | 0 |
| 37.27048 | 58.78714 | 0 |
| 37.27333 | 58.80388 | 0 |
| 37.27126 | 58.82509 | 0 |
| 37.26279 | 58.82949 | 0 |
| 37.25796 | 58.83984 | 0 |
| 37.27524 | 58.87566 | 0 |
| 37.29247 | 58.90336 | 0 |
| 37.2905  | 58.93204 | 0 |
| 37.31318 | 58.99175 | 0 |
| 37.30367 | 58.99031 | 0 |
| 37.28865 | 58.99512 | 0 |
| 37.27169 | 58.99948 | 0 |
| 37.25487 | 58.99908 | 0 |
| 37.28125 | 59.03889 | 0 |
| 37.26863 | 59.03595 | 0 |
| 37.2791  | 59.07253 | 0 |
| 37.26085 | 59.07753 | 0 |
| 37.24458 | 59.07515 | 0 |

|          |          |   |
|----------|----------|---|
| 37.22337 | 59.07305 | 0 |
| 37.19895 | 59.03243 | 0 |
| 37.23969 | 59.08601 | 0 |
| 37.2451  | 59.10678 | 0 |
| 37.22358 | 59.11034 | 0 |
| 37.20734 | 59.12431 | 0 |
| 37.19077 | 59.12379 | 0 |
| 37.16716 | 59.10816 | 0 |
| 37.14709 | 59.08275 | 0 |
| 37.12363 | 59.0788  | 0 |
| 37.09724 | 59.14135 | 0 |
| 37.15932 | 59.22035 | 0 |
| 36.98804 | 59.36854 | 0 |
| 36.97724 | 59.34903 | 0 |
| 36.96822 | 59.35293 | 0 |
| 36.97573 | 59.36268 | 0 |
| 36.97308 | 59.37416 | 0 |
| 36.96393 | 59.37963 | 0 |
| 36.97198 | 59.38929 | 0 |
| 36.95978 | 59.39166 | 0 |
| 36.9489  | 59.46336 | 0 |
| 36.94674 | 59.52436 | 0 |
| 36.90193 | 59.52708 | 0 |
| 36.86525 | 59.51955 | 0 |
| 36.84431 | 59.4805  | 0 |
| 36.83997 | 59.40608 | 0 |
| 36.80984 | 59.39116 | 0 |
| 36.77979 | 59.36932 | 0 |
| 36.78391 | 59.44785 | 0 |
| 36.79904 | 59.51969 | 0 |
| 36.81921 | 59.56883 | 0 |
| 36.83278 | 59.61224 | 0 |
| 36.86601 | 59.66622 | 0 |
| 36.89855 | 59.73299 | 0 |
| 36.90942 | 59.70175 | 0 |
| 36.87875 | 59.73941 | 0 |
| 36.86591 | 59.75986 | 0 |
| 36.85629 | 59.77853 | 0 |
| 36.83315 | 59.76618 | 0 |
| 36.805   | 59.75915 | 0 |
| 36.78632 | 59.75588 | 0 |
| 36.76819 | 59.75624 | 0 |
| 36.73565 | 59.7701  | 0 |
| 36.70669 | 59.7554  | 0 |
| 36.6754  | 59.7704  | 0 |

|          |          |   |
|----------|----------|---|
| 36.66928 | 59.74067 | 0 |
| 36.69311 | 59.98263 | 0 |
| 36.71901 | 60.01837 | 0 |
| 36.72071 | 59.81109 | 0 |
| 36.69962 | 59.77564 | 0 |
| 36.66905 | 59.80517 | 0 |
| 36.6202  | 59.75571 | 0 |
| 36.41803 | 60.19444 | 0 |
| 36.46594 | 60.23577 | 0 |
| 36.47342 | 60.10972 | 0 |
| 36.50448 | 60.07126 | 0 |
| 36.51629 | 60.09728 | 0 |
| 36.21894 | 60.23183 | 0 |
| 36.67597 | 59.88319 | 0 |
| 36.7147  | 59.86797 | 0 |
| 36.78502 | 59.86394 | 0 |
| 36.51202 | 59.76094 | 0 |
| 36.46622 | 59.81054 | 0 |
| 36.40607 | 59.84376 | 0 |
| 36.31713 | 59.85008 | 0 |
| 36.26437 | 59.92923 | 0 |
| 36.29456 | 59.6812  | 0 |
| 36.36691 | 59.59197 | 0 |
| 36.45213 | 59.54145 | 0 |
| 36.54269 | 59.40892 | 0 |
| 36.53261 | 59.3147  | 0 |
| 36.54833 | 59.24238 | 0 |
| 37.02681 | 58.74645 | 0 |
| 36.98371 | 58.65318 | 0 |
| 36.96409 | 58.56462 | 0 |
| 37.08635 | 58.52685 | 0 |
| 37.1551  | 58.58764 | 0 |
| 37.52053 | 58.58357 | 0 |
| 37.5915  | 58.58622 | 0 |
| 37.48382 | 58.71888 | 0 |
| 37.72075 | 58.31453 | 0 |
| 37.68569 | 58.24729 | 0 |
| 37.64897 | 58.30177 | 0 |
| 37.61491 | 58.37028 | 0 |
| 37.54925 | 58.43399 | 0 |
| 37.4854  | 58.48926 | 0 |
| 37.33888 | 58.84272 | 0 |
| 37.24313 | 58.99892 | 0 |
| 37.14985 | 58.97217 | 0 |
| 37.69238 | 58.43288 | 0 |

|          |          |   |
|----------|----------|---|
| 37.76501 | 58.26385 | 0 |
| 37.80498 | 58.14663 | 0 |
| 37.47866 | 58.175   | 0 |
| 36.60172 | 64.29742 | 0 |
| 34.46007 | 63.91618 | 0 |
| 34.45606 | 63.62844 | 0 |
| 34.4866  | 63.38501 | 0 |
| 34.4599  | 63.10192 | 0 |
| 34.44382 | 62.89625 | 0 |
| 34.62113 | 62.58306 | 0 |
| 34.63376 | 62.37054 | 0 |
| 33.8914  | 62.6445  | 0 |
| 33.63138 | 62.63398 | 0 |
| 33.43861 | 63.03738 | 0 |
| 34.86632 | 60.1907  | 0 |
| 35.04577 | 59.89041 | 0 |
| 35.51433 | 59.84767 | 0 |
| 35.38658 | 58.65703 | 0 |
| 33.35841 | 58.48966 | 0 |
| 35.63335 | 58.52979 | 0 |
| 35.52552 | 58.77781 | 0 |
| 36.58241 | 54.35698 | 0 |
| 36.63097 | 54.66044 | 0 |
| 36.66189 | 54.86709 | 0 |
| 36.76782 | 55.20019 | 0 |
| 37.05097 | 55.70175 | 0 |
| 37.37109 | 56.09588 | 0 |
| 37.45043 | 56.41716 | 0 |
| 38.80722 | 57.7982  | 0 |
| 37.82522 | 58.07355 | 0 |
| 37.35539 | 54.4676  | 0 |
| 37.39443 | 56.73825 | 0 |
| 35.4077  | 58.27722 | 0 |
| 35.36968 | 58.51215 | 0 |
| 35.3624  | 58.52906 | 0 |
| 35.34902 | 58.54431 | 0 |
| 35.33078 | 58.54551 | 0 |
| 35.31905 | 58.5733  | 0 |
| 35.33318 | 58.60281 | 0 |
| 35.34986 | 58.61669 | 0 |
| 35.36353 | 58.56574 | 0 |
| 35.36217 | 58.65041 | 0 |
| 35.34526 | 58.64843 | 0 |
| 35.33326 | 58.6522  | 0 |
| 35.35794 | 58.75499 | 0 |

|          |          |   |
|----------|----------|---|
| 35.33701 | 58.8087  | 0 |
| 35.36717 | 58.72784 | 0 |
| 35.37657 | 58.67398 | 0 |
| 35.37077 | 58.58624 | 0 |
| 35.35738 | 58.48484 | 0 |
| 35.37261 | 58.44396 | 0 |
| 35.34214 | 58.28109 | 0 |
| 35.34535 | 58.23278 | 0 |
| 35.37181 | 58.21523 | 0 |
| 35.36889 | 58.25293 | 0 |
| 35.37736 | 58.28091 | 0 |
| 35.44377 | 58.30102 | 0 |
| 35.45778 | 58.35392 | 0 |
| 35.44928 | 58.35984 | 0 |
| 35.3961  | 58.4318  | 0 |
| 35.26463 | 59.14178 | 0 |
| 35.25627 | 59.15114 | 0 |
| 35.26127 | 59.17111 | 0 |
| 35.26075 | 59.18886 | 0 |
| 35.24403 | 59.19978 | 0 |
| 35.23368 | 59.19235 | 0 |
| 35.23866 | 59.15601 | 0 |
| 35.29713 | 59.12871 | 0 |
| 35.28699 | 59.11284 | 0 |
| 35.28015 | 59.09364 | 0 |
| 35.277   | 59.07838 | 0 |
| 35.24984 | 59.08443 | 0 |
| 35.2402  | 59.10277 | 0 |
| 35.23512 | 59.17875 | 0 |
| 35.25525 | 59.13313 | 0 |
| 35.25843 | 59.1142  | 0 |
| 35.26416 | 59.12578 | 0 |
| 36.33332 | 57.68255 | 0 |
| 36.33255 | 57.69632 | 0 |
| 36.32304 | 57.6829  | 0 |
| 36.32548 | 57.70544 | 0 |
| 36.33794 | 57.71339 | 0 |
| 36.34203 | 57.72872 | 0 |
| 36.35187 | 57.75715 | 0 |
| 36.36527 | 57.69769 | 0 |
| 36.36868 | 57.67835 | 0 |
| 36.37568 | 57.63086 | 0 |
| 36.38151 | 57.60539 | 0 |
| 36.3969  | 57.6197  | 0 |
| 36.40404 | 57.69305 | 0 |

|          |          |   |
|----------|----------|---|
| 36.41902 | 57.65823 | 0 |
| 36.44731 | 57.60806 | 0 |
| 36.44786 | 57.56328 | 0 |
| 36.44262 | 57.65782 | 0 |
| 36.42585 | 57.4708  | 0 |
| 36.39843 | 57.43774 | 0 |
| 36.36726 | 57.3447  | 0 |
| 36.36341 | 57.31635 | 0 |
| 36.37589 | 57.27777 | 0 |
| 36.3914  | 57.25849 | 0 |
| 36.43148 | 57.25082 | 0 |
| 36.4605  | 57.26328 | 0 |
| 36.4649  | 57.3151  | 0 |
| 36.43913 | 57.21071 | 0 |
| 36.50859 | 57.18968 | 0 |
| 36.56405 | 57.16034 | 0 |
| 36.54136 | 57.04565 | 0 |
| 36.51588 | 56.99868 | 0 |
| 36.47904 | 56.96179 | 0 |
| 36.49078 | 56.91475 | 0 |
| 36.57191 | 56.9131  | 0 |
| 36.61887 | 56.97025 | 0 |
| 36.57903 | 56.88099 | 0 |
| 36.55428 | 56.83898 | 0 |
| 35.72115 | 59.53133 | 0 |
| 35.77661 | 59.54108 | 0 |
| 35.79855 | 59.50884 | 0 |
| 35.79207 | 59.44808 | 0 |
| 35.75983 | 59.41854 | 0 |
| 35.72512 | 59.41773 | 0 |
| 35.68589 | 59.41089 | 0 |
| 35.64245 | 59.70844 | 0 |
| 35.67901 | 59.69582 | 0 |
| 35.74908 | 59.625   | 0 |
| 35.72734 | 59.54931 | 0 |
| 35.71448 | 59.48427 | 0 |
| 35.68544 | 59.42804 | 0 |
| 35.68816 | 59.3947  | 0 |
| 35.69754 | 59.31648 | 0 |
| 35.71201 | 59.27765 | 0 |
| 35.7631  | 59.28819 | 0 |
| 35.7848  | 59.33468 | 0 |
| 35.79834 | 59.46351 | 0 |
| 35.8092  | 59.51564 | 0 |
| 35.80852 | 59.47539 | 0 |

|          |          |   |
|----------|----------|---|
| 35.77062 | 59.42239 | 0 |
| 35.7967  | 59.39654 | 0 |
| 35.77611 | 59.31988 | 0 |
| 35.80742 | 59.32285 | 0 |
| 35.74301 | 59.26012 | 0 |
| 35.71045 | 59.25266 | 0 |
| 35.1766  | 60.35201 | 0 |
| 35.19335 | 60.32427 | 0 |
| 35.21031 | 60.30375 | 0 |
| 35.22184 | 60.305   | 0 |
| 35.21815 | 60.28941 | 0 |
| 35.21178 | 60.28027 | 0 |
| 35.19999 | 60.28837 | 0 |
| 35.20178 | 60.31065 | 0 |
| 35.18414 | 60.33048 | 0 |
| 35.19181 | 60.35425 | 0 |
| 35.19832 | 60.36249 | 0 |
| 35.18962 | 60.37011 | 0 |
| 35.17668 | 60.36943 | 0 |
| 35.16564 | 60.36496 | 0 |
| 35.15447 | 60.35697 | 0 |
| 35.15479 | 60.37349 | 0 |
| 35.15592 | 60.39239 | 0 |
| 35.14816 | 60.40849 | 0 |
| 35.13933 | 60.39025 | 0 |
| 35.13816 | 60.37323 | 0 |
| 35.12848 | 60.41686 | 0 |
| 35.11789 | 60.41428 | 0 |
| 35.10804 | 60.40233 | 0 |
| 35.09698 | 60.42295 | 0 |
| 35.08108 | 60.43692 | 0 |
| 35.06995 | 60.44436 | 0 |
| 36.46553 | 59.20143 | 0 |
| 36.45062 | 59.18848 | 0 |
| 36.44226 | 59.172   | 0 |
| 36.42833 | 59.15121 | 0 |
| 36.42427 | 59.16172 | 0 |
| 36.41895 | 59.14681 | 0 |
| 36.29559 | 59.6452  | 0 |
| 36.29335 | 59.06367 | 0 |
| 36.28337 | 59.05027 | 0 |



| decimalLatitude | decimalLongitude | Euphorbia.ferdowsiana |
|-----------------|------------------|-----------------------|
| 36.345          | 59.055           | 1                     |
| 36.28           | 59.124           | 1                     |
| 36.316          | 59.202           | 1                     |
| 36.30516        | 59.07874         | 1                     |
| 36.30613        | 59.0787          | 1                     |
| 36.087          | 59.288           | 0                     |
| 36.121          | 59.37            | 0                     |
| 36.274          | 59.116           | 0                     |
| 36.305          | 59.155           | 0                     |
| 36.354          | 58.889           | 0                     |
| 36.377          | 59.258           | 0                     |
| 36.584          | 58.949           | 0                     |
| 36.59657        | 58.59321         | 0                     |
| 36.78083        | 58.55241         | 0                     |
| 36.36046        | 59.11382         | 0                     |
| 36.3639         | 59.11003         | 0                     |
| 36.72587        | 59.84027         | 0                     |
| 36.68079        | 59.92821         | 0                     |
| 36.69714        | 59.83772         | 0                     |
| 36.6933         | 59.79366         | 0                     |
| 36.69085        | 59.77002         | 0                     |
| 36.75945        | 59.87055         | 0                     |
| 36.7865         | 59.88192         | 0                     |
| 36.78007        | 59.84174         | 0                     |
| 36.74736        | 59.77523         | 0                     |
| 36.77661        | 59.80681         | 0                     |
| 36.75023        | 59.74981         | 0                     |
| 36.66066        | 59.61685         | 0                     |
| 36.69443        | 59.63573         | 0                     |
| 36.80957        | 59.85363         | 0                     |
| 36.79735        | 59.80603         | 0                     |
| 36.78855        | 59.71586         | 0                     |
| 36.78053        | 59.64075         | 0                     |
| 36.76374        | 59.60461         | 0                     |
| 36.75225        | 59.5694          | 0                     |
| 36.70963        | 59.51126         | 0                     |
| 36.73656        | 59.54857         | 0                     |
| 36.74391        | 59.55933         | 0                     |
| 36.76672        | 59.56239         | 0                     |
| 36.84574        | 59.59843         | 0                     |
| 36.83167        | 59.57944         | 0                     |
| 36.90834        | 59.74107         | 0                     |
| 36.88123        | 59.69605         | 0                     |
| 36.86461        | 59.6513          | 0                     |

|          |          |   |
|----------|----------|---|
| 36.85712 | 59.62217 | 0 |
| 36.81668 | 59.54302 | 0 |
| 36.81346 | 59.4931  | 0 |
| 36.96459 | 59.71897 | 0 |
| 36.91806 | 59.6534  | 0 |
| 36.90367 | 59.61714 | 0 |
| 36.89321 | 59.5878  | 0 |
| 36.87908 | 59.55394 | 0 |
| 36.8637  | 59.53741 | 0 |
| 36.84516 | 59.52282 | 0 |
| 36.82904 | 59.50353 | 0 |
| 36.80304 | 59.48163 | 0 |
| 36.77382 | 59.42939 | 0 |
| 36.80013 | 59.45515 | 0 |
| 36.82079 | 59.48514 | 0 |
| 36.84604 | 59.50428 | 0 |
| 36.88925 | 59.55656 | 0 |
| 36.91446 | 59.57303 | 0 |
| 36.93449 | 59.60411 | 0 |
| 36.93781 | 59.54898 | 0 |
| 36.91781 | 59.52216 | 0 |
| 36.9052  | 59.49514 | 0 |
| 36.89924 | 59.48142 | 0 |
| 36.89694 | 59.46765 | 0 |
| 36.87993 | 59.44947 | 0 |
| 36.86421 | 59.43076 | 0 |
| 36.85082 | 59.4125  | 0 |
| 36.82932 | 59.39336 | 0 |
| 36.83251 | 59.36401 | 0 |
| 36.85704 | 59.37502 | 0 |
| 36.87798 | 59.40154 | 0 |
| 36.88912 | 59.41974 | 0 |
| 36.90673 | 59.42252 | 0 |
| 36.92152 | 59.44999 | 0 |
| 36.93699 | 59.45983 | 0 |
| 36.97345 | 59.48022 | 0 |
| 36.99489 | 59.51211 | 0 |
| 37.02616 | 59.53403 | 0 |
| 36.99658 | 59.47834 | 0 |
| 36.97833 | 59.42321 | 0 |
| 36.97149 | 59.40169 | 0 |
| 36.95078 | 59.38326 | 0 |
| 36.93573 | 59.35447 | 0 |
| 36.91037 | 59.3211  | 0 |
| 36.90191 | 59.31593 | 0 |

|          |          |   |
|----------|----------|---|
| 36.92895 | 59.32427 | 0 |
| 36.84723 | 59.28712 | 0 |
| 36.89299 | 59.30308 | 0 |
| 36.93543 | 59.31138 | 0 |
| 37.00958 | 59.38496 | 0 |
| 37.04352 | 59.41232 | 0 |
| 37.03285 | 59.37978 | 0 |
| 37.00578 | 59.32974 | 0 |
| 37.00474 | 59.28308 | 0 |
| 37.02931 | 59.30033 | 0 |
| 37.03428 | 59.24338 | 0 |
| 37.07683 | 59.1004  | 0 |
| 36.9933  | 59.01839 | 0 |
| 37.05623 | 59.05242 | 0 |
| 37.05192 | 58.97054 | 0 |
| 36.97395 | 58.78465 | 0 |
| 37.03526 | 58.78311 | 0 |
| 37.09076 | 58.71078 | 0 |
| 36.71629 | 60.23407 | 0 |
| 36.71048 | 60.18659 | 0 |
| 36.69877 | 60.12353 | 0 |
| 36.67315 | 60.02527 | 0 |
| 36.65667 | 59.96075 | 0 |
| 36.63567 | 59.91268 | 0 |
| 36.57297 | 59.84025 | 0 |
| 36.52198 | 59.76838 | 0 |
| 36.47429 | 59.64499 | 0 |
| 36.45121 | 59.5874  | 0 |
| 36.38078 | 59.63273 | 0 |
| 36.38885 | 59.76544 | 0 |
| 36.31551 | 59.77293 | 0 |
| 36.39125 | 59.63537 | 0 |
| 36.78287 | 59.9055  | 0 |
| 36.84537 | 59.86076 | 0 |
| 36.84802 | 59.79867 | 0 |
| 36.834   | 59.75032 | 0 |
| 36.68648 | 59.67176 | 0 |
| 36.97482 | 59.64401 | 0 |
| 36.96569 | 59.61726 | 0 |
| 36.9428  | 59.58962 | 0 |
| 36.92633 | 59.57685 | 0 |
| 36.75098 | 59.00311 | 0 |
| 36.72546 | 58.99801 | 0 |
| 36.69726 | 59.0388  | 0 |
| 36.6704  | 59.04602 | 0 |

|          |          |   |
|----------|----------|---|
| 36.63369 | 59.06737 | 0 |
| 36.60689 | 59.08867 | 0 |
| 36.60017 | 59.27708 | 0 |
| 36.50842 | 59.46393 | 0 |
| 36.57348 | 60.02637 | 0 |
| 36.62673 | 60.04379 | 0 |
| 36.63979 | 59.957   | 0 |
| 36.64006 | 59.90089 | 0 |
| 36.69205 | 59.9505  | 0 |
| 36.70589 | 60.06947 | 0 |
| 36.74097 | 60.1353  | 0 |
| 36.78801 | 59.89403 | 0 |
| 36.79279 | 59.83774 | 0 |
| 36.78842 | 59.7974  | 0 |
| 36.77461 | 59.67137 | 0 |
| 36.80672 | 59.65334 | 0 |
| 36.76058 | 59.63706 | 0 |
| 36.72617 | 59.61535 | 0 |
| 36.71188 | 59.60217 | 0 |
| 36.69208 | 59.5939  | 0 |
| 36.75444 | 59.61189 | 0 |
| 36.76461 | 59.51963 | 0 |
| 36.74641 | 59.46525 | 0 |
| 36.73929 | 59.41904 | 0 |
| 36.74317 | 59.37281 | 0 |
| 36.70056 | 59.32138 | 0 |
| 36.68304 | 59.29178 | 0 |
| 36.64842 | 59.3232  | 0 |
| 37.10519 | 58.66687 | 0 |
| 37.16153 | 58.74415 | 0 |
| 37.39725 | 58.75718 | 0 |
| 37.42973 | 58.76681 | 0 |
| 37.39064 | 58.7024  | 0 |
| 37.36887 | 58.72768 | 0 |
| 37.40603 | 58.80474 | 0 |
| 37.42279 | 58.85227 | 0 |
| 37.3962  | 58.8224  | 0 |
| 37.35538 | 58.79043 | 0 |
| 37.34913 | 58.7529  | 0 |
| 37.3335  | 58.79561 | 0 |
| 37.28931 | 58.7534  | 0 |
| 37.2315  | 58.74865 | 0 |
| 37.17178 | 58.78164 | 0 |
| 37.18623 | 58.89712 | 0 |
| 37.24655 | 58.96168 | 0 |

|          |          |   |
|----------|----------|---|
| 37.18451 | 58.93679 | 0 |
| 37.23935 | 59.12079 | 0 |
| 37.22348 | 59.20629 | 0 |
| 37.17744 | 59.21417 | 0 |
| 37.10345 | 59.18024 | 0 |
| 37.06172 | 59.13421 | 0 |
| 37.10752 | 59.30888 | 0 |
| 37.10749 | 59.38991 | 0 |
| 36.87114 | 59.00148 | 0 |
| 36.94362 | 59.11303 | 0 |
| 36.89063 | 59.04438 | 0 |
| 36.95862 | 59.34409 | 0 |
| 36.97345 | 59.56467 | 0 |
| 36.91957 | 59.62678 | 0 |
| 36.85793 | 59.6341  | 0 |
| 36.77211 | 59.70606 | 0 |
| 36.74705 | 59.90592 | 0 |
| 36.64895 | 59.88526 | 0 |
| 37.06202 | 59.51236 | 0 |
| 37.08206 | 59.72071 | 0 |
| 37.09632 | 59.68558 | 0 |
| 36.87275 | 59.94283 | 0 |
| 36.84491 | 59.90472 | 0 |
| 36.74312 | 59.83154 | 0 |
| 36.68538 | 59.78646 | 0 |
| 36.63545 | 59.74637 | 0 |
| 36.65659 | 59.72264 | 0 |
| 36.63778 | 60.00589 | 0 |
| 36.63992 | 60.06291 | 0 |
| 36.6188  | 60.05853 | 0 |
| 36.58251 | 60.06474 | 0 |
| 36.35421 | 59.95143 | 0 |
| 36.41766 | 59.79367 | 0 |
| 36.63132 | 59.94818 | 0 |
| 36.64742 | 60.13899 | 0 |
| 35.91736 | 59.90191 | 0 |
| 37.13383 | 59.18624 | 0 |
| 37.11954 | 59.17257 | 0 |
| 37.12809 | 59.24688 | 0 |
| 37.10541 | 59.23697 | 0 |
| 37.07331 | 59.24598 | 0 |
| 37.13301 | 59.28483 | 0 |
| 37.10573 | 59.33741 | 0 |
| 37.08276 | 59.39067 | 0 |
| 37.05193 | 59.4345  | 0 |

|          |          |   |
|----------|----------|---|
| 37.03696 | 59.4313  | 0 |
| 37.0189  | 59.42701 | 0 |
| 37.01009 | 59.41643 | 0 |
| 36.99706 | 59.41325 | 0 |
| 36.98784 | 59.42173 | 0 |
| 37.01316 | 59.46277 | 0 |
| 37.04119 | 59.48855 | 0 |
| 37.0488  | 59.52081 | 0 |
| 37.03964 | 59.54007 | 0 |
| 37.0267  | 59.55947 | 0 |
| 37.58387 | 58.50859 | 0 |
| 37.58718 | 58.4829  | 0 |
| 37.59046 | 58.46525 | 0 |
| 37.61098 | 58.45875 | 0 |
| 37.6278  | 58.44982 | 0 |
| 37.6236  | 58.4209  | 0 |
| 37.62893 | 58.40728 | 0 |
| 37.63828 | 58.40899 | 0 |
| 37.6429  | 58.42152 | 0 |
| 37.63547 | 58.43907 | 0 |
| 37.64031 | 58.46109 | 0 |
| 37.63324 | 58.46883 | 0 |
| 37.62705 | 58.49811 | 0 |
| 37.56229 | 58.5277  | 0 |
| 37.55375 | 58.51759 | 0 |
| 37.54309 | 58.52863 | 0 |
| 37.51992 | 58.50506 | 0 |
| 37.50339 | 58.50401 | 0 |
| 37.49213 | 58.49729 | 0 |
| 37.47556 | 58.51304 | 0 |
| 37.48657 | 58.56216 | 0 |
| 37.46334 | 58.52748 | 0 |
| 37.4475  | 58.54779 | 0 |
| 37.44398 | 58.57374 | 0 |
| 37.46805 | 58.60307 | 0 |
| 37.49332 | 58.62248 | 0 |
| 37.5142  | 58.65011 | 0 |
| 37.57022 | 58.64852 | 0 |
| 37.58447 | 58.6235  | 0 |
| 37.57974 | 58.64947 | 0 |
| 37.59351 | 58.6549  | 0 |
| 37.56914 | 58.67166 | 0 |
| 37.5553  | 58.6723  | 0 |
| 37.53933 | 58.66175 | 0 |
| 37.52176 | 58.66365 | 0 |

|          |          |   |
|----------|----------|---|
| 37.50316 | 58.66087 | 0 |
| 37.48358 | 58.64729 | 0 |
| 37.46868 | 58.64103 | 0 |
| 37.45845 | 58.62539 | 0 |
| 37.44518 | 58.61833 | 0 |
| 37.43593 | 58.61947 | 0 |
| 37.43367 | 58.63367 | 0 |
| 37.44385 | 58.66118 | 0 |
| 37.43381 | 58.68178 | 0 |
| 37.44496 | 58.70646 | 0 |
| 37.46636 | 58.7246  | 0 |
| 37.46565 | 58.7445  | 0 |
| 37.47395 | 58.76965 | 0 |
| 37.48082 | 58.78849 | 0 |
| 37.47879 | 58.80368 | 0 |
| 37.47429 | 58.81453 | 0 |
| 37.4612  | 58.81204 | 0 |
| 37.4419  | 58.81486 | 0 |
| 37.42987 | 58.81314 | 0 |
| 37.41757 | 58.80764 | 0 |
| 37.40642 | 58.79225 | 0 |
| 37.3968  | 58.78119 | 0 |
| 37.38725 | 58.78461 | 0 |
| 37.37434 | 58.78114 | 0 |
| 37.36193 | 58.78201 | 0 |
| 37.35337 | 58.7765  | 0 |
| 37.33344 | 58.77286 | 0 |
| 37.31762 | 58.76875 | 0 |
| 37.3056  | 58.76627 | 0 |
| 37.29588 | 58.76719 | 0 |
| 37.28593 | 58.77233 | 0 |
| 37.28059 | 58.79659 | 0 |
| 37.27048 | 58.78714 | 0 |
| 37.27333 | 58.80388 | 0 |
| 37.27126 | 58.82509 | 0 |
| 37.26279 | 58.82949 | 0 |
| 37.25796 | 58.83984 | 0 |
| 37.27524 | 58.87566 | 0 |
| 37.29247 | 58.90336 | 0 |
| 37.2905  | 58.93204 | 0 |
| 37.31318 | 58.99175 | 0 |
| 37.30367 | 58.99031 | 0 |
| 37.28865 | 58.99512 | 0 |
| 37.27169 | 58.99948 | 0 |
| 37.25487 | 58.99908 | 0 |

|          |          |   |
|----------|----------|---|
| 37.28125 | 59.03889 | 0 |
| 37.26863 | 59.03595 | 0 |
| 37.2791  | 59.07253 | 0 |
| 37.26085 | 59.07753 | 0 |
| 37.24458 | 59.07515 | 0 |
| 37.22337 | 59.07305 | 0 |
| 37.19895 | 59.03243 | 0 |
| 37.23969 | 59.08601 | 0 |
| 37.2451  | 59.10678 | 0 |
| 37.22358 | 59.11034 | 0 |
| 37.20734 | 59.12431 | 0 |
| 37.19077 | 59.12379 | 0 |
| 37.16716 | 59.10816 | 0 |
| 37.14709 | 59.08275 | 0 |
| 37.12363 | 59.0788  | 0 |
| 37.09724 | 59.14135 | 0 |
| 37.15932 | 59.22035 | 0 |
| 36.98804 | 59.36854 | 0 |
| 36.97724 | 59.34903 | 0 |
| 36.96822 | 59.35293 | 0 |
| 36.97573 | 59.36268 | 0 |
| 36.97308 | 59.37416 | 0 |
| 36.96393 | 59.37963 | 0 |
| 36.97198 | 59.38929 | 0 |
| 36.95978 | 59.39166 | 0 |
| 36.9489  | 59.46336 | 0 |
| 36.94674 | 59.52436 | 0 |
| 36.90193 | 59.52708 | 0 |
| 36.86525 | 59.51955 | 0 |
| 36.84431 | 59.4805  | 0 |
| 36.83997 | 59.40608 | 0 |
| 36.80984 | 59.39116 | 0 |
| 36.77979 | 59.36932 | 0 |
| 36.78391 | 59.44785 | 0 |
| 36.79904 | 59.51969 | 0 |
| 36.81921 | 59.56883 | 0 |
| 36.83278 | 59.61224 | 0 |
| 36.86601 | 59.66622 | 0 |
| 36.89855 | 59.73299 | 0 |
| 36.90942 | 59.70175 | 0 |
| 36.87875 | 59.73941 | 0 |
| 36.86591 | 59.75986 | 0 |
| 36.85629 | 59.77853 | 0 |
| 36.83315 | 59.76618 | 0 |
| 36.805   | 59.75915 | 0 |



|          |          |   |
|----------|----------|---|
| 36.78632 | 59.75588 | 0 |
| 36.76819 | 59.75624 | 0 |
| 36.73565 | 59.7701  | 0 |
| 36.70669 | 59.7554  | 0 |
| 36.6754  | 59.7704  | 0 |
| 36.66928 | 59.74067 | 0 |
| 36.69311 | 59.98263 | 0 |
| 36.71901 | 60.01837 | 0 |
| 36.72071 | 59.81109 | 0 |
| 36.69962 | 59.77564 | 0 |
| 36.66905 | 59.80517 | 0 |
| 36.6202  | 59.75571 | 0 |
| 36.41803 | 60.19444 | 0 |
| 36.46594 | 60.23577 | 0 |
| 36.47342 | 60.10972 | 0 |
| 36.50448 | 60.07126 | 0 |
| 36.51629 | 60.09728 | 0 |
| 36.21894 | 60.23183 | 0 |
| 36.67597 | 59.88319 | 0 |
| 36.7147  | 59.86797 | 0 |
| 36.78502 | 59.86394 | 0 |
| 36.51202 | 59.76094 | 0 |
| 36.46622 | 59.81054 | 0 |
| 36.40607 | 59.84376 | 0 |
| 36.31713 | 59.85008 | 0 |
| 36.26437 | 59.92923 | 0 |
| 36.29456 | 59.6812  | 0 |
| 36.36691 | 59.59197 | 0 |
| 36.45213 | 59.54145 | 0 |
| 36.54269 | 59.40892 | 0 |
| 36.53261 | 59.3147  | 0 |
| 36.54833 | 59.24238 | 0 |
| 37.02681 | 58.74645 | 0 |
| 36.98371 | 58.65318 | 0 |
| 36.96409 | 58.56462 | 0 |
| 37.08635 | 58.52685 | 0 |
| 37.1551  | 58.58764 | 0 |
| 37.52053 | 58.58357 | 0 |
| 37.5915  | 58.58622 | 0 |
| 37.48382 | 58.71888 | 0 |
| 37.72075 | 58.31453 | 0 |
| 37.68569 | 58.24729 | 0 |
| 37.64897 | 58.30177 | 0 |
| 37.61491 | 58.37028 | 0 |
| 37.54925 | 58.43399 | 0 |

|          |          |   |
|----------|----------|---|
| 37.4854  | 58.48926 | 0 |
| 37.33888 | 58.84272 | 0 |
| 37.24313 | 58.99892 | 0 |
| 37.14985 | 58.97217 | 0 |
| 37.69238 | 58.43288 | 0 |
| 37.76501 | 58.26385 | 0 |
| 37.80498 | 58.14663 | 0 |
| 37.47866 | 58.175   | 0 |
| 36.60172 | 64.29742 | 0 |
| 34.46007 | 63.91618 | 0 |
| 34.45606 | 63.62844 | 0 |
| 34.4866  | 63.38501 | 0 |
| 34.4599  | 63.10192 | 0 |
| 34.44382 | 62.89625 | 0 |
| 34.62113 | 62.58306 | 0 |
| 34.63376 | 62.37054 | 0 |
| 33.8914  | 62.6445  | 0 |
| 33.63138 | 62.63398 | 0 |
| 33.43861 | 63.03738 | 0 |
| 34.86632 | 60.1907  | 0 |
| 35.04577 | 59.89041 | 0 |
| 35.51433 | 59.84767 | 0 |
| 35.38658 | 58.65703 | 0 |
| 33.35841 | 58.48966 | 0 |
| 35.63335 | 58.52979 | 0 |
| 35.52552 | 58.77781 | 0 |
| 36.58241 | 54.35698 | 0 |
| 36.63097 | 54.66044 | 0 |
| 36.66189 | 54.86709 | 0 |
| 36.76782 | 55.20019 | 0 |
| 37.05097 | 55.70175 | 0 |
| 37.37109 | 56.09588 | 0 |
| 37.45043 | 56.41716 | 0 |
| 38.80722 | 57.7982  | 0 |
| 37.82522 | 58.07355 | 0 |
| 37.35539 | 54.4676  | 0 |
| 37.39443 | 56.73825 | 0 |
| 35.4077  | 58.27722 | 0 |
| 35.36968 | 58.51215 | 0 |
| 35.3624  | 58.52906 | 0 |
| 35.34902 | 58.54431 | 0 |
| 35.33078 | 58.54551 | 0 |
| 35.31905 | 58.5733  | 0 |
| 35.33318 | 58.60281 | 0 |
| 35.34986 | 58.61669 | 0 |

|          |          |   |
|----------|----------|---|
| 35.36353 | 58.56574 | 0 |
| 35.36217 | 58.65041 | 0 |
| 35.34526 | 58.64843 | 0 |
| 35.33326 | 58.6522  | 0 |
| 35.35794 | 58.75499 | 0 |
| 35.33701 | 58.8087  | 0 |
| 35.36717 | 58.72784 | 0 |
| 35.37657 | 58.67398 | 0 |
| 35.37077 | 58.58624 | 0 |
| 35.35738 | 58.48484 | 0 |
| 35.37261 | 58.44396 | 0 |
| 35.34214 | 58.28109 | 0 |
| 35.34535 | 58.23278 | 0 |
| 35.37181 | 58.21523 | 0 |
| 35.36889 | 58.25293 | 0 |
| 35.37736 | 58.28091 | 0 |
| 35.44377 | 58.30102 | 0 |
| 35.45778 | 58.35392 | 0 |
| 35.44928 | 58.35984 | 0 |
| 35.3961  | 58.4318  | 0 |
| 35.26463 | 59.14178 | 0 |
| 35.25627 | 59.15114 | 0 |
| 35.26127 | 59.17111 | 0 |
| 35.26075 | 59.18886 | 0 |
| 35.24403 | 59.19978 | 0 |
| 35.23368 | 59.19235 | 0 |
| 35.23866 | 59.15601 | 0 |
| 35.29713 | 59.12871 | 0 |
| 35.28699 | 59.11284 | 0 |
| 35.28015 | 59.09364 | 0 |
| 35.277   | 59.07838 | 0 |
| 35.24984 | 59.08443 | 0 |
| 35.2402  | 59.10277 | 0 |
| 35.23512 | 59.17875 | 0 |
| 35.25525 | 59.13313 | 0 |
| 35.25843 | 59.1142  | 0 |
| 35.26416 | 59.12578 | 0 |
| 36.33332 | 57.68255 | 0 |
| 36.33255 | 57.69632 | 0 |
| 36.32304 | 57.6829  | 0 |
| 36.32548 | 57.70544 | 0 |
| 36.33794 | 57.71339 | 0 |
| 36.34203 | 57.72872 | 0 |
| 36.35187 | 57.75715 | 0 |
| 36.36527 | 57.69769 | 0 |

|          |          |   |
|----------|----------|---|
| 36.36868 | 57.67835 | 0 |
| 36.37568 | 57.63086 | 0 |
| 36.38151 | 57.60539 | 0 |
| 36.3969  | 57.6197  | 0 |
| 36.40404 | 57.69305 | 0 |
| 36.41902 | 57.65823 | 0 |
| 36.44731 | 57.60806 | 0 |
| 36.44786 | 57.56328 | 0 |
| 36.44262 | 57.65782 | 0 |
| 36.42585 | 57.4708  | 0 |
| 36.39843 | 57.43774 | 0 |
| 36.36726 | 57.3447  | 0 |
| 36.36341 | 57.31635 | 0 |
| 36.37589 | 57.27777 | 0 |
| 36.3914  | 57.25849 | 0 |
| 36.43148 | 57.25082 | 0 |
| 36.4605  | 57.26328 | 0 |
| 36.4649  | 57.3151  | 0 |
| 36.43913 | 57.21071 | 0 |
| 36.50859 | 57.18968 | 0 |
| 36.56405 | 57.16034 | 0 |
| 36.54136 | 57.04565 | 0 |
| 36.51588 | 56.99868 | 0 |
| 36.47904 | 56.96179 | 0 |
| 36.49078 | 56.91475 | 0 |
| 36.57191 | 56.9131  | 0 |
| 36.61887 | 56.97025 | 0 |
| 36.57903 | 56.88099 | 0 |
| 36.55428 | 56.83898 | 0 |
| 35.72115 | 59.53133 | 0 |
| 35.77661 | 59.54108 | 0 |
| 35.79855 | 59.50884 | 0 |
| 35.79207 | 59.44808 | 0 |
| 35.75983 | 59.41854 | 0 |
| 35.72512 | 59.41773 | 0 |
| 35.68589 | 59.41089 | 0 |
| 35.64245 | 59.70844 | 0 |
| 35.67901 | 59.69582 | 0 |
| 35.74908 | 59.625   | 0 |
| 35.72734 | 59.54931 | 0 |
| 35.71448 | 59.48427 | 0 |
| 35.68544 | 59.42804 | 0 |
| 35.68816 | 59.3947  | 0 |
| 35.69754 | 59.31648 | 0 |
| 35.71201 | 59.27765 | 0 |

|          |          |   |
|----------|----------|---|
| 35.7631  | 59.28819 | 0 |
| 35.7848  | 59.33468 | 0 |
| 35.79834 | 59.46351 | 0 |
| 35.8092  | 59.51564 | 0 |
| 35.80852 | 59.47539 | 0 |
| 35.77062 | 59.42239 | 0 |
| 35.7967  | 59.39654 | 0 |
| 35.77611 | 59.31988 | 0 |
| 35.80742 | 59.32285 | 0 |
| 35.74301 | 59.26012 | 0 |
| 35.71045 | 59.25266 | 0 |
| 35.1766  | 60.35201 | 0 |
| 35.19335 | 60.32427 | 0 |
| 35.21031 | 60.30375 | 0 |
| 35.22184 | 60.305   | 0 |
| 35.21815 | 60.28941 | 0 |
| 35.21178 | 60.28027 | 0 |
| 35.19999 | 60.28837 | 0 |
| 35.20178 | 60.31065 | 0 |
| 35.18414 | 60.33048 | 0 |
| 35.19181 | 60.35425 | 0 |
| 35.19832 | 60.36249 | 0 |
| 35.18962 | 60.37011 | 0 |
| 35.17668 | 60.36943 | 0 |
| 35.16564 | 60.36496 | 0 |
| 35.15447 | 60.35697 | 0 |
| 35.15479 | 60.37349 | 0 |
| 35.15592 | 60.39239 | 0 |
| 35.14816 | 60.40849 | 0 |
| 35.13933 | 60.39025 | 0 |
| 35.13816 | 60.37323 | 0 |
| 35.12848 | 60.41686 | 0 |
| 35.11789 | 60.41428 | 0 |
| 35.10804 | 60.40233 | 0 |
| 35.09698 | 60.42295 | 0 |
| 35.08108 | 60.43692 | 0 |
| 35.06995 | 60.44436 | 0 |
| 36.46553 | 59.20143 | 0 |
| 36.45062 | 59.18848 | 0 |
| 36.44226 | 59.172   | 0 |
| 36.42833 | 59.15121 | 0 |
| 36.42427 | 59.16172 | 0 |
| 36.41895 | 59.14681 | 0 |
| 36.29559 | 59.6452  | 0 |
| 36.29335 | 59.06367 | 0 |

36.28337

59.05027

0
